# Supplementary material
Source: Springer Nature journal article supplement (https://www.springermedizin.de/resource/supplementary/12960_2004_25_MOESM2_ESM.pdf/9570232)

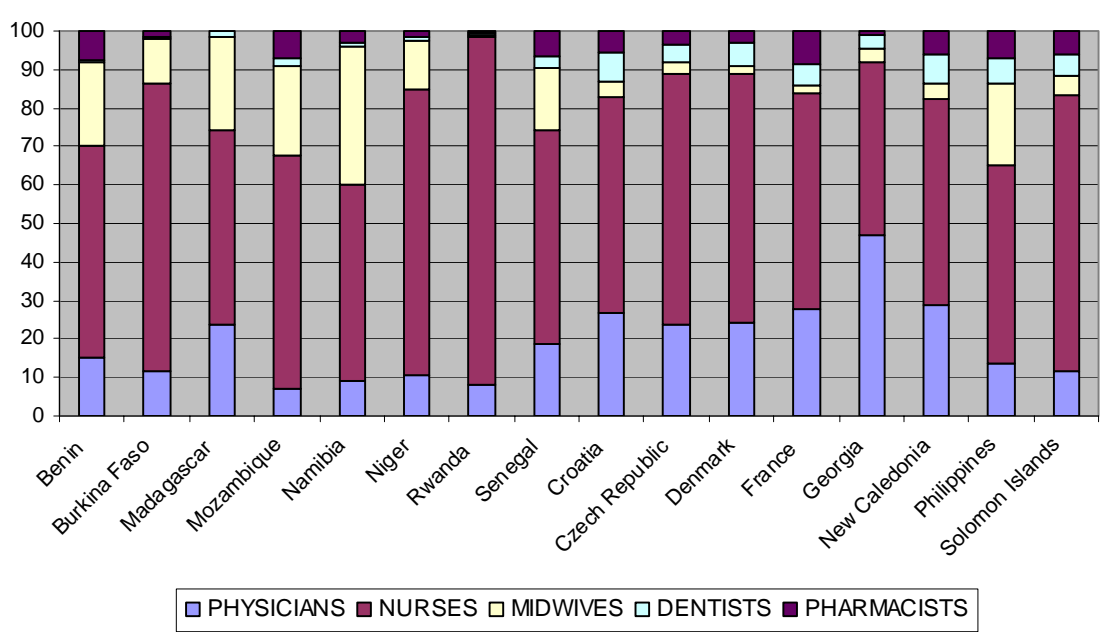

Supplement: MOESM2 [file 9570232]
